# Supplementary material for: Ultrasound molecular imaging-guided tumor gene therapy through dual-targeted cationic microbubbles
Source: Royal Society of Chemistry journal article supplement (doi:10.1039/d0bm01857k), 2021-01-01
Supplement: d0bm01857k1.pdf [file d0bm01857k1.pdf]

### Supplementary Figures

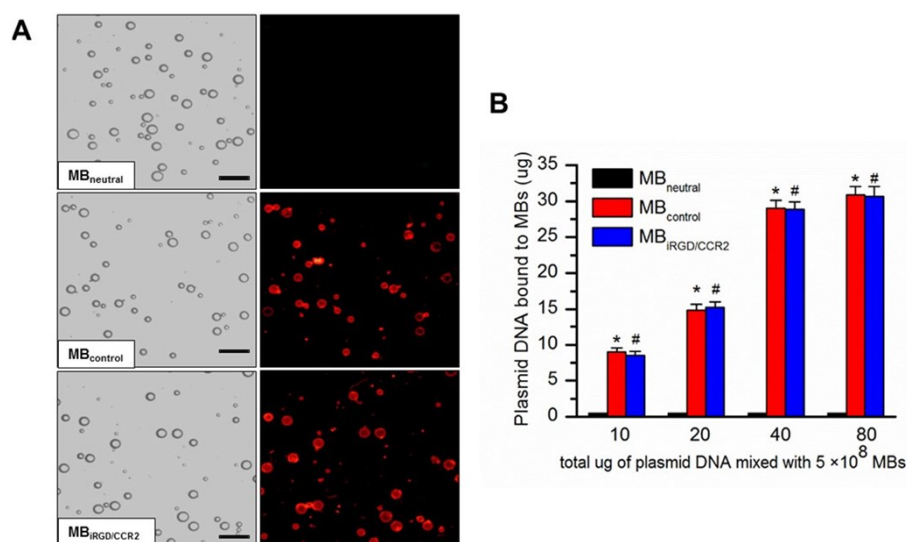

**Fig. S1** DNA-loading efficiency of dual-targeted MBs. (A) DNA plasmids bound to MB<sub>neutral</sub>, MB<sub>control</sub> or MB<sub>IRGD/CCR2</sub> were stained with PI dye (red). (B) Quantitative analysis of the loading DNA per  $5 \times 10^8$  MBs. Scale bar: 5  $\mu$ m.

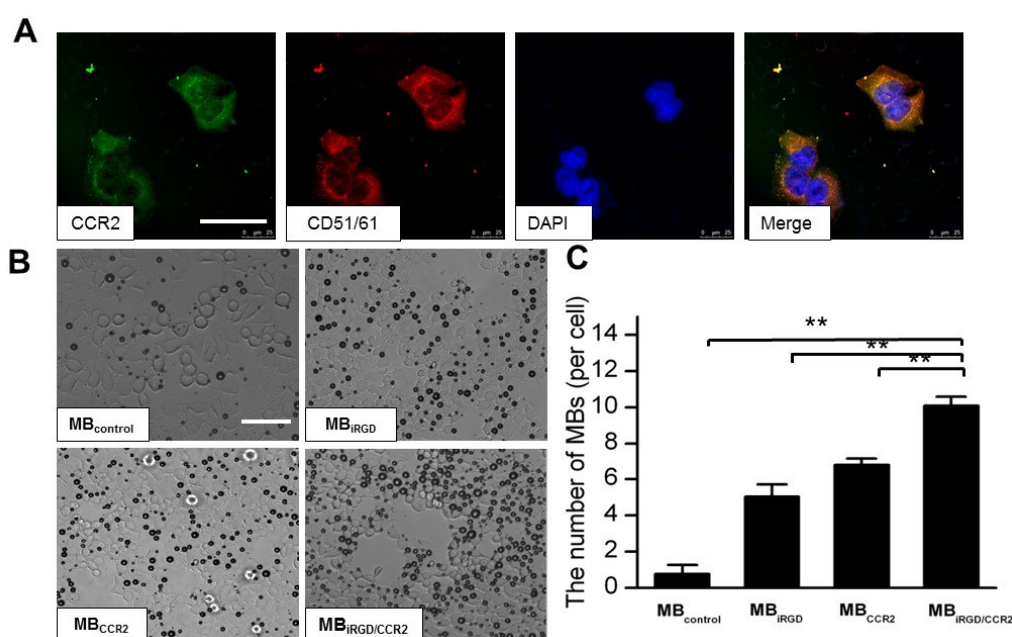

**Fig. S2** Protein expression and cell attachment efficiency. (A) Immunofluorescence histochemical staining of integrin  $\alpha_v\beta_3$  and CCR2 receptors in MCF-7 cells. The expression of CCR2 and integrin  $\alpha_v\beta_3$  was confirmed. Scale bar: 10  $\mu$ m. (B) Static binding assay on MCF-7 cells with MB<sub>control</sub>, MB<sub>IRGD</sub>, MB<sub>CCR2</sub>, and MB<sub>IRGD/CCR2</sub>. Scale bar: 10  $\mu$ m. (C) Comparison of the adherent bubble number per cell among the groups.

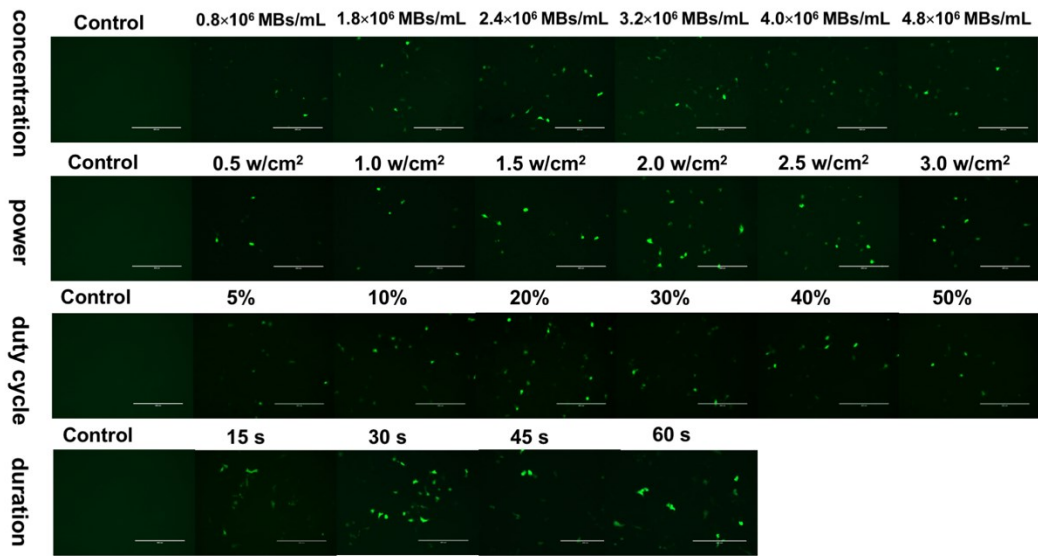

Fig.S3 Cell transfection of dual-targeted cationic microbubbles in various ultrasound irradiation conditions,including: concentration,power,duty cycle and duration.

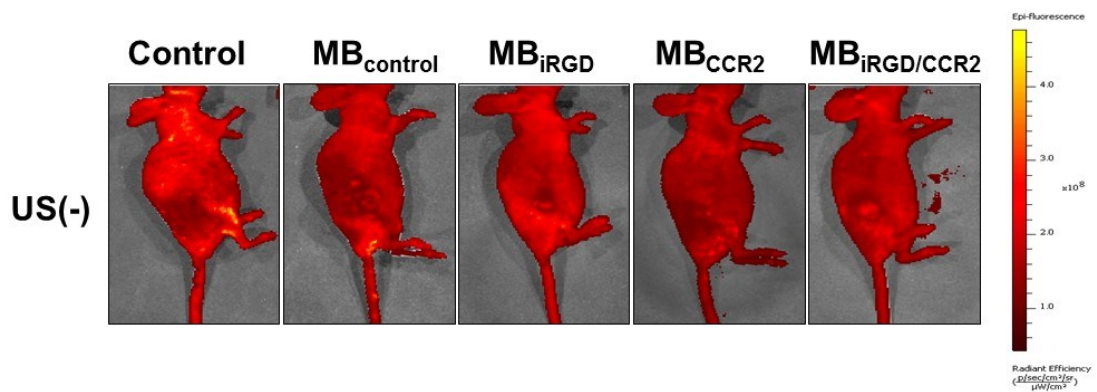

Fig. S4 GFP expression was detected after 72 h transfection with PBS, MB<sub>control</sub>, MB<sub>iRGD</sub>, MB<sub>CCR2</sub>, or MB<sub>iRGD/CCR2</sub> without US.

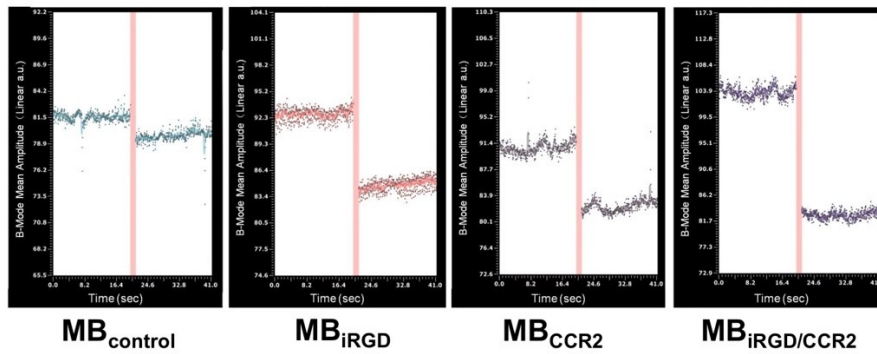

Fig S5 The acoustic intensity of ultrasound image of before-after flash in field of view after intravenous injection of MB<sub>control</sub>, MB<sub>iRGD</sub>, MB<sub>CCR2</sub>, or MB<sub>iRGD/CCR2</sub>

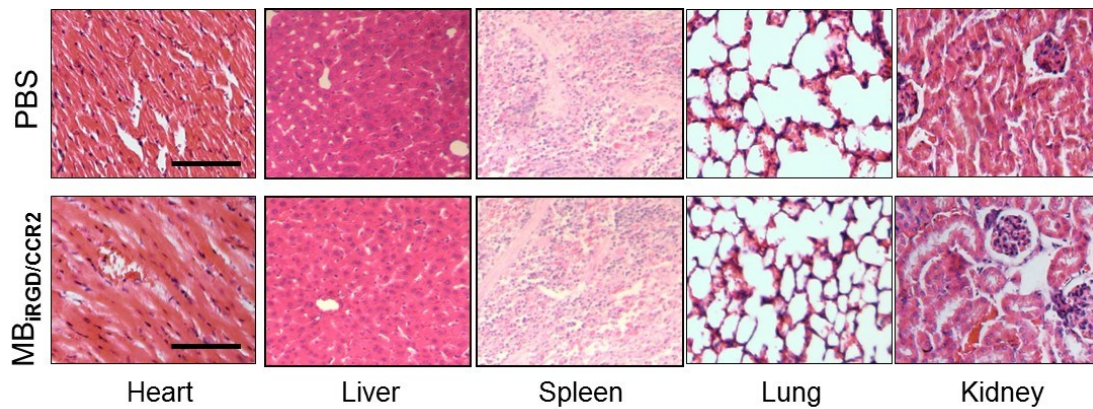

Fig. S6 Hematoxylin/eosin (HE) staining analysis of the histological structure of tissues, including the heart, liver, spleen, lung, and kidney, 72 h after gene transfection with MB<sub>iRGD/CCR2</sub>. PBS treatment was used as a control.

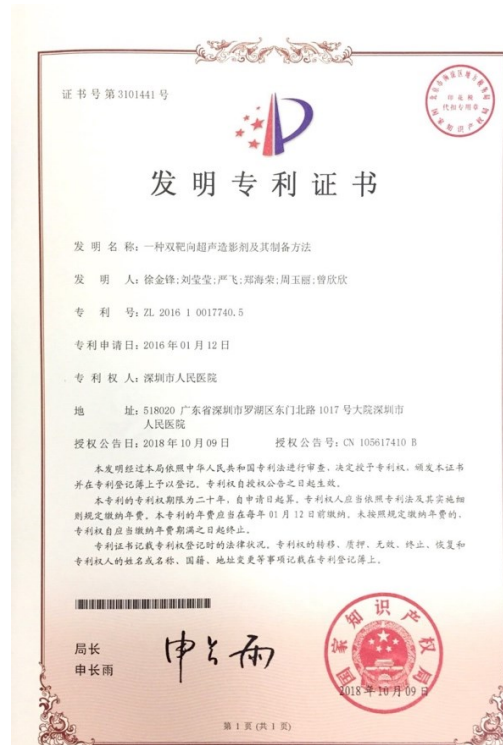

**Fig. S7** The patent certificate issued by the state intellectual property office of China. The invention relates to a dual-targeted ultrasound contrast agent and its preparation method.

## Supplementary Tables

**Table S1.** The characteristics of the resulting various microbubbles, including MB<sub>neutral</sub>, MB<sub>control</sub>, MB<sub>iRGD</sub>, MB<sub>CCR2</sub>.

| <b>MB name</b>          | <b>Diameter<br/>(<math>\mu\text{m}</math>)</b> | <b>Zeta-potential<br/>(mV)</b> | <b>Concentration<br/>(<math>\times 10^9/\text{ml}</math>)</b> |
|-------------------------|------------------------------------------------|--------------------------------|---------------------------------------------------------------|
| MB <sub>neutral</sub>   | 1.26 $\pm$ 0.10                                | -11.38 $\pm$ 1.06              | 4.22 $\pm$ 0.31                                               |
| MB <sub>control</sub>   | 1.21 $\pm$ 0.13                                | 25.40 $\pm$ 2.26*              | 4.45 $\pm$ 0.25                                               |
| MB <sub>iRGD</sub>      | 1.24 $\pm$ 0.14                                | 27.50 $\pm$ 2.32*              | 4.30 $\pm$ 0.44                                               |
| MB <sub>CCR2</sub>      | 1.28 $\pm$ 0.17                                | 32.64 $\pm$ 2.05*              | 3.96 $\pm$ 0.17                                               |
| MB <sub>iRGD/CCR2</sub> | 1.32 $\pm$ 0.22                                | 28.45 $\pm$ 2.41*              | 3.98 $\pm$ 0.65                                               |

\* P<0.001 VS. MB<sub>neutral</sub>, n = 3 per group
